## Molecular phylogenetics and the evolution of fruit and leaf morphology of *Dichaea* (Orchidaceae: Zygopetalinae)

Kurt M. Neubig<sup>1,2,\*</sup>, Norris H. Williams<sup>2</sup>, W. Mark Whitten<sup>2</sup> and Franco Pupulin<sup>3</sup>

<sup>1</sup>Department of Botany, University of Florida, Gainesville, FL 32611-8526, USA, <sup>2</sup>Florida Museum of Natural History, University of Florida, PO Box 117800, Gainesville, FL 32611-7800, USA and <sup>3</sup>Jardín Botánico Lankester, Universidad de Costa Rica, Apartado 1031-7050 Cartago, Costa Rica

Received: 29 April 2008 Returned for revision: 8 July 2008 Accepted: 4 December 2008 Published electronically: 30 January 2009

- **Background and Aims** The orchid genus *Dichaea*, with over 100 species found throughout the neotropics, is easily recognized by distichous leaves on long stems without pseudobulbs and flowers with infrastigmatic ligules. The genus has previously been divided into four sections based primarily on presence of ovary bristles and a foliar abscission layer. The aim of this work is to use DNA sequence data to estimate phylogenetic relationships within *Dichaea* and map the distribution of major morphological characters that have been used to delimit subgenera/sections.
- **Methods** Sequence data for the nuclear ribosomal internal transcribed spacers and plastid *matK*, *trnL* intron, *trnL-F* spacer and *yef1* for 67 ingroup and seven outgroup operational taxonomic units were used to estimate phylogenetic relationships within *Dichaea*. Taxa from each of the four sections were sampled, with the greatest representation from section *Dichaea*, the most diverse and taxonomically puzzling group.
- **Key Results** Molecular data and morphology support monophyly of *Dichaea*. Results indicate that section *Dichaeopsis* is polyphyletic and based on symplesiomorphies, including deciduous leaves and smooth ovaries that are widespread in Zygopetalinae. There are at least three well-supported clades within section *Dichaeopsis*. Section *Pseudodichaea* is monophyletic and defined by setose ovaries and leaves with an abscission layer. Sections *Dichaea* and *Dichaeastrum* are monophyletic and defined by pendent habit and persistent leaves. Section *Dichaeastrum*, distinguished from section *Dichaea* primarily by a glabrous ovary, is potentially polyphyletic.
- **Conclusions** The leaf abscission layer was lost once, occurring only in the derived sections *Dichaea* and *Dichaeastrum*. The setose fruit is a more homoplasious character with several losses and gains within the genus. We propose an informal division of the genus based upon five well-supported clades.

**Key words:** *Dichaea*, *matK*, nrITS, Orchidaceae, *trnL* intron, *trnL-F* spacer, *yef1*, Zygopetalinae.

### INTRODUCTION

*Dichaea* Lindl. is a rarely cultivated orchid genus, closely related to some commonly cultivated, showy genera including *Zygopetalum* Hook., *Huntleya* Bateman ex Lindl. and *Pescatoria* Rchb.f. With approx. 100 species, *Dichaea* is found throughout the neotropics, reaching peak diversity in the equatorial Andes. *Dichaea* is the largest genus in subtribe Zygopetalinae with about 400 species (Chase *et al.*, 2003). Zygopetalinae form a strongly supported clade (Whitten *et al.*, 2000) within tribe Cymbidiaceae (Chase *et al.*, 2003). All members of this subtribe are part of an exclusively neotropical clade within the widespread tribe Cymbidiaceae that also includes *Catasetinae*, *Coeliopsidinae*, *Cymbidiinae*, *Cyrtopodiinae*, *Eriopsidinae*, *Eulophiinae*, *Maxillariinae*, *Oncidiinae*, *Stanhopeinae* and *Vargasiellinae*.

The unusual habit and floral morphology (Fig. 1) of *Dichaea* have made its systematic position controversial. Szlachetko (1995) placed *Dichaea* in the monogeneric subtribe *Dichaeinae*, part of a larger tribe *Dichaeaceae* including *Vargasiella* C.Schweinf., *Fernandezia* Lindl. and *Pachyphyllum* Kunth, all with a similar vegetative habit. No sequence data have been

published for *Vargasiella*, but it is now treated as the only member of subtribe *Vargasiellinae* (Romero and Carnevali, 1993; Pridgeon *et al.*, 2009). Molecular data clearly place *Fernandezia* and *Pachyphyllum* in *Oncidiinae* (Williams *et al.*, 2001). Although placement of *Dichaea* within Zygopetalinae was novel in the molecular analysis of Whitten *et al.* (2000), it was supported by single-flowered inflorescences, pollinarium structure and pseudobulbless stems (Dressler, 1993b).

Since Lindley (1833) described *Dichaea*, generic and sub-generic classifications have been problematic. Knowles and Westcott (1839) first addressed subgeneric categories within the genus. They erected a second genus, *Epithecia* Knowles & Westc., for species with articulate (deciduous) leaves. Pfitzer (1889) described another segregate genus, *Dichaeopsis*, to encompass species with articulate leaves, apparently ignoring the work of Knowles and Westcott. Kuntze (1904) reduced *Dichaeopsis* to a section within *Dichaea*. Cogniaux (1906) retained *Dichaea* as a single genus of four sections: *Dichaea* (as *Eudichaea*), *Dichaeastrum* Cogn., *Dichaeopsis* (Pfitzer) Kuntze and *Pseudodichaea* Cogn. Section *Dichaea* was distinguished by setose ovaries and non-articulate leaves, section *Dichaeastrum* by glabrous ovaries and non-articulate leaves, section *Dichaeopsis* by glabrous ovaries and articulate leaves

\* For correspondence. E-mail kneubig@ftmnh.ufl.edu

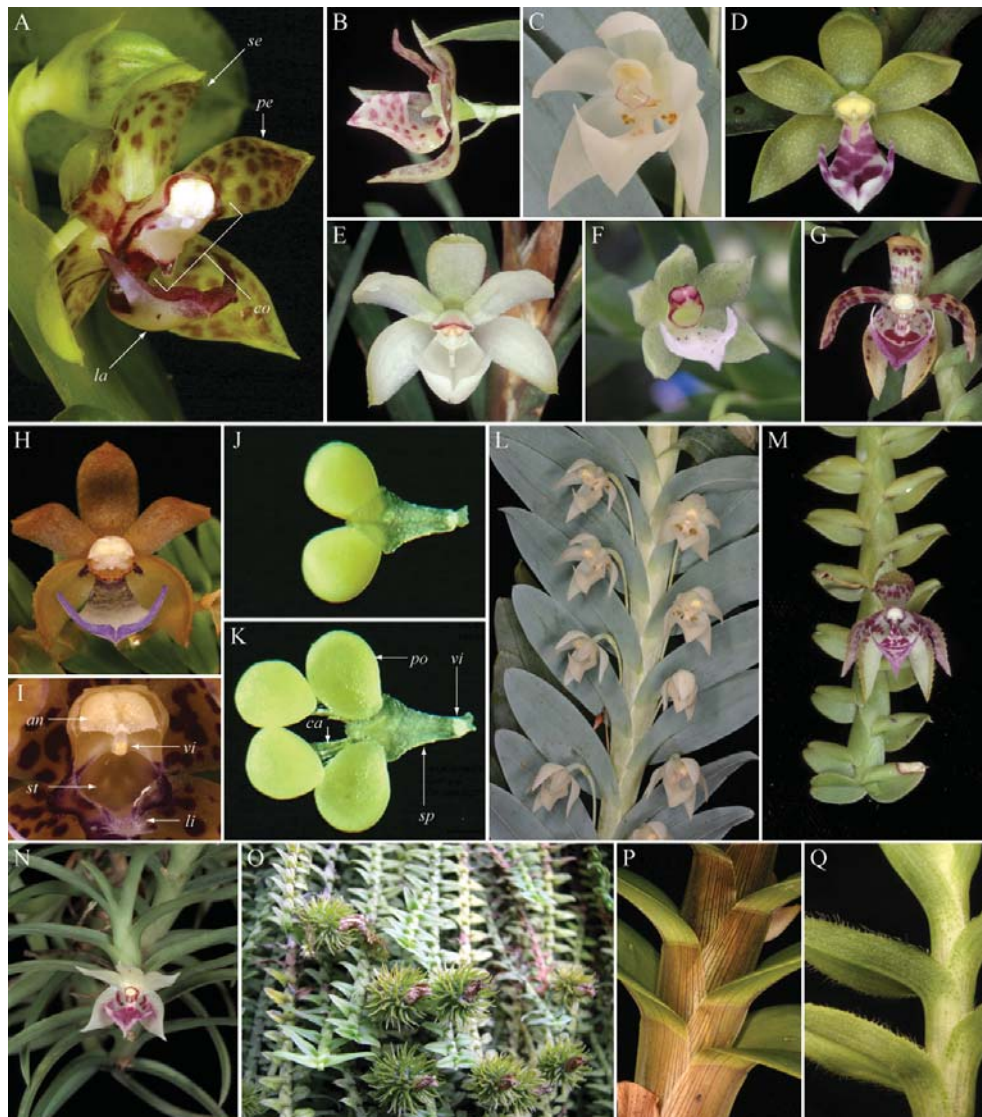

FIG. 1. Morphological features of *Dichaea*: (A) *Dichaea globosa* (section *Pseudodichaea*) (*co* = column, *pe* = petal, *la* = labellum, *se* = sepal); (B) *D. panamensis* (section *Dichaeopsis*); (C) *D. glauca* (section *Dichaeopsis*); (D) *D. trulla* (section *Dichaeopsis*); (E) *D. caveroi* (section *Dichaeopsis*); (F) *D. ancoraelabia* (section *Dichaeopsis*); (G) *D. poicillantha* (section *Dichaea*); (H) *D. squarrosa* (section *Dichaea*); (I) typical column (note the round stigma and pubescent infrastigmatic ligule; *an* = anther, *li* = infrastigmatic ligule, *st* = stigma, *vi* = viscidium); (J) pollinarium of *Dichaea* in natural configuration; (K) pollinarium pressed to show the elastic caudicles as the upper pollinia extend over the lower ones (*ca* = caudicle, *po* = pollinium, *sp* = stipe, *vi* = viscidium); (L) *D. glauca* (note erect stem and thickly glaucous leaves); (M) *D. cryptarrhena*; note strongly pendulous habit; (N) *D. ecuadorensis* (note semi-erect habit); (O) spiny fruits of section *Dichaea*; (P) leaves with an abscission layer between the sheath and blade (section *Pseudodichaea*); (Q) leaves lacking an abscission layer (section *Dichaea*).

and section *Pseudodichaea* by setose ovaries and articulate leaves. Although Cogniaux's treatment was limited to Brazilian *Dichaea*, his sections did encompass all combinations of the two characters (i.e. leaf abscission and setose ovaries). Schlechter (1914) accepted the four groups of Cogniaux but preferred the generic delimitation of Knowles and Westcott (1839). Therefore he placed sections *Dichaea* and *Dichaeastrum* in *Dichaea* and sections *Dichaeopsis* and *Pseudodichaea* in *Epithelia*. Kränzlin (1923) treated the group as a single genus with three sections: *Dichaea*, *Dichaeopsis* and *Maxillariopsis* Kränzl. However, the four species placed in section *Maxillariopsis* are currently treated as members of *Maxillariella* M.A. Blanco & Carnevali in subtribe Maxillariinae (Folsom,

1987, 1996). Senghas (1996), who followed Kränzlin's work closely, erected two subgenera in *Dichaea*. His subgenus *Dichaea* included section *Dichaea* and subgenus *Epithelia* included sections *Dichaeopsis* and *Maxillariopsis*.

There is no monograph, revision or even synopsis of the entire genus. Folsom (1987) monographed section *Dichaea*, the most taxonomically and morphologically diverse group in the genus. In addition to his monograph, he diagrammed his ideas of the relationships within section *Dichaea* in a non-cladistic manner. In his revision of Costa Rican *Dichaea*, Pupulin (2007) presented a morphological cladistic analysis (limited to Costa Rican taxa). Historically, infrageneric classifications of *Dichaea* were based on one to few characters



without a phylogenetic framework and with conflicting results. No sectional scheme of *Dichaea* has ever used clearly defined apomorphic characters to circumscribe subgeneric taxa. The objective of this study was to use DNA sequence data [nuclear ribosomal internal transcribed spacers (nrITS), the plastid *matK*, *trnL* intron, *trnL-F* intergenic spacer and *ycf1*] to reconstruct phylogenetic relationships in *Dichaea* and map the distribution of major morphological characters that have previously been used to delimit subgenera/sections. For purposes of clarity, the classification of Cogniaux (1906), as above, will be followed.

## MATERIALS AND METHODS

### *Taxon sampling*

Specimens were obtained from wild-collected and cultivated plants (Appendix). Sampling of *Dichaea* included 35 species, representing all four described sections of *Dichaea*. Outgroups included six other genera of subtribe Zygopetalinae and *Heterotaxis violaceopunctata* (Rchb.f.) F. Barros (subtribe Maxillariinae). Outgroups were chosen based on phylogenetic placement in previous work (Cameron, 2001, 2004; Cameron *et al.*, 1999; Chase *et al.*, 2003; Whitten *et al.*, 2000).

### *Extractions, amplification and sequencing*

All freshly collected material was preserved in silica gel (Chase and Hills, 1991). Genomic DNA was extracted using a modified 2 × CTAB (cetyl trimethylammonium bromide) technique (Doyle and Doyle, 1987), scaled to a 1-mL volume reaction. Approximately 10 mg of dried tissue were ground in 1 mL of 2 × CTAB buffer and either 8 µL of β-mercaptoethanol or 10 µL of proteinase-K. Some total DNAs were then cleaned with Qiagen QIAquick PCR purification columns to remove any inhibitory secondary compounds (e.g. species of section *Pseudodichaea*). Amplifications were performed using a Biometra Tgradient or an Eppendorf Mastercycler EP Gradient S thermocycler and Sigma brand reagents in 25-µL volumes with the following reaction components for ITS: 0.5–1.0 µL template DNA (approx. 10–100 ng), 11 µL water, 6.5 µL 5M betaine, 2.5 µL 10 × buffer, 3 µL MgCl<sub>2</sub>, 0.5 µL of 10 µM dNTPs, 0.5 µL each of 10 µM primers and 0.5 units *Taq*. For the plastid regions the following reaction components were used: 0.5–1.0 µL template DNA (approx. 10–100 ng), 16–17.5 µL water, 2.5 µL 10 × buffer, 2–4 µL MgCl<sub>2</sub>, 0.5 µL of 10 µM dNTPs, 0.5 µL each of 10 µM primers and 0.5 units *Taq*.

*nrITS* (*ITS 1* + 5.8S *rDNA* + *ITS 2*). This region was amplified with the parameters 99 °C, 10 min; 94 °C hold for *Taq* addition; 33 × (94 °C, 45 s; 65 °C, 1 min; 72 °C, 1 min); 72 °C, 3 min, with the primers 17SE and 26SE from Sun *et al.* (1994).

*matK-trnK*. This region includes the entire *matK* gene and the flanking 3' *trnK* spacer. This region was amplified with the parameters 94 °C, 3 min; 33 × (94 °C, 45 s; 60 °C, 45 s; 72 °C, 2 min); 72 °C, 3 min, with primers –19F (Molvray *et al.*, 2000) and trnK2R (Johnson and Soltis, 1994). Internal

sequencing primers were 308F and 1520R (Whitten *et al.*, 2007). Some outgroups were amplified using the primers 56F and 1520R (Whitten *et al.*, 2000) that yielded a shorter, but nearly complete sequence of *matK* (missing the 3' spacer).

*trnL-trnF*. This region includes both the *trnL* intron and the spacer between *trnL* and *trnF* (hereafter collectively referred to as *trnL-F*). This region was amplified with the parameters 94 °C, 3 min; 33 × (94 °C, 1 min; 58 °C, 1 min; 72 °C, 1 min, 20 s); 72 °C, 6 min, with the primers c and f from Taberlet *et al.* (1991). Additional primers d and e were rarely required for sequencing.

*ycf1*. In *Phalaenopsis* Blume (GenBank: AY916449), this open reading frame is nearly 6 kb in length and may be the most variable coding region within the plastid genome (M. Moore, Oberlin College, OH, USA, pers. comm.). An approx. 1500-base-pair (bp) portion from the 3' end was sequenced. This region was amplified using a 'touchdown' protocol with the parameters 94 °C, 3 min; 8 × (94 °C, 30 s; 60–51 °C, 1 min; 72 °C, 3 min); 30 × (94 °C, 30 s; 50 °C, 1 min; 72 °C, 3 min); 72 °C, 3 min, with primers 3720F (TAC GTA TGT AAT GAA CGA ATG G) and 5500R (GCT GTT ATT GGC ATC AAA CCA ATA GCG). Additional internal primers intF (GAT CTG GAC CAA TGC ACA TAT T) and intR (TTT GAT TGG GAT GAT CCA AGG) were also required for sequencing.

Products were cleaned with Microclean™ (The Gel Company, San Francisco, CA, USA) following the manufacturer's protocols, eluted with 50 µL of 10 mM Tris–HCl (pH 8.5) and stored at 4 °C. Purified PCR products were then cycle-sequenced using the parameters 96 °C, 10 s; 25 × (96 °C, 10 s; 50 °C, 5 s; 60 °C, 4 min), with mix of 3 µL water, 1 µL fluorescent Big Dye dideoxy terminator, 2 µL Better Buffer™ (The Gel Company), 1 µL template and 0.5 µL primer. Cycle sequencing products were cleaned using ExoSAP™ (USB Corporation, OH, USA) following the manufacturer's protocols. Purified cycle sequencing products were directly sequenced using BigDye terminator reagents on an ABI 377, 3100 or 3130 automated sequencer according to the manufacturer's protocols (Applied Biosystems, Foster City, CA, USA). Electropherograms were edited and assembled using Sequencher 4.6™ (GeneCodes, Ann Arbor, MI, USA). All sequences were deposited in GenBank (Appendix).

### *Data analysis*

Sequence data were manually aligned using Se-Al v2.0a11 (Rambaut, 1996). No sequence data were excluded from analyses. Indels (insertions/deletions) were coded as missing. Analyses were performed using PAUP\* 4.0b10 (Swofford, 1999) with Fitch parsimony (unordered characters with equal weights; Fitch, 1971). A heuristic search strategy consisted of branch swapping by tree bisection reconnection (TBR), stepwise addition with 5000 random-addition replicates holding five trees at each step, and saving multiple trees (MulTrees). Levels of support were assessed using the bootstrap (Felsenstein, 1985). Bootstrap percentages were estimated with 1000 bootstrap replicates, using TBR swapping for five random-addition replicates per bootstrap replicate.

Maximum likelihood (ML) analyses were performed using the program Garli 0.95 (Zwickl, 2006), assuming a GTR + I +  $\Gamma$  model. Modeltest (Posada and Crandall, 1998) was used to determine the appropriate model for analysis using all combined data under the Akaike Information Criterion. However, because the results from maximum likelihood analyses are so similar to those found with parsimony searches, they are not presented here.

All analyses were performed for datasets including ITS only, plastid regions only and all data combined. Data congruence was tested using the partition homogeneity test in PAUP\*4.0b10 (Swofford, 1999) as described by Johnson and Soltis (1998). Heuristic searches for the partition homogeneity tests were performed using 100 replicates and TBR branch-swapping. Probability values lower than 0.05 were used to identify data sets that were significantly different from one another.

## RESULTS

The aligned length of the ITS data set was 758 bp. Of these, 270 were potentially parsimony informative (35.6%). Fitch parsimony analysis of the ITS region found 53 equally parsimonious trees of 896 steps [consistency index (CI) = 0.58, retention index (RI) = 0.86]. The aligned length of the combined plastid dataset (*matK*, *trnL-F* and *ycf1*) was 4719 bp. Of these, 413 were potentially parsimony informative (8.8%). Fitch analysis of the combined plastid regions found 3407 equally parsimonious trees of 1054 steps (CI = 0.79, RI = 0.92). Individually (trees not shown), *trnL-F* had a total of 1278 characters, with 106 potentially parsimony informative, giving trees of 276 steps (CI = 0.80, RI = 0.92); *matK* had a total of 1813 characters, with 126 potentially parsimony informative, giving trees of 316 steps (CI = 0.83, RI = 0.93); and *ycf1* had a total of 1628 characters, with 181 potentially parsimony informative, giving trees of 457 steps (CI = 0.77, RI = 0.91). Fitch parsimony analysis of all four regions found 725 equally parsimonious trees of 1982 steps (CI = 0.68, RI = 0.88). Maximum likelihood searches gave log likelihood scores ( $-\ln L$ ) of 6221.06, 13936.48 and 20857.29 for ITS only, plastid regions only and all five regions, respectively.

The partition homogeneity test comparing ITS and the combined plastid data showed significant incongruence compared with random partitions of the same size ( $P = 0.01$ ,  $\alpha = 0.05$ ). Various combinations of each of the four of individual datasets, however, did not indicate significant incongruence (ITS/*trnL-F*  $P = 0.07$ ; ITS/*matK*  $P = 0.16$ ; *matK/trnL-F*  $P = 0.30$ ; *ycf1/matK*  $P = 0.76$ ; *ycf1/trnL-F*  $P = 0.78$ ) except between ITS and *ycf1* ( $P = 0.01$ ). The combined plastid data did conflict with ITS, apparently due to the addition of *ycf1*. A visual comparison of bootstrap percentages between the ITS and plastid data sets shows that there are only three strongly supported cases of incongruence (e.g. the positions of *D. tuerckheimii* Schltr., *D. glauca* Lindl. and *D. elliptica* Dressler & Folsom; Fig. 2). Furthermore, the exclusion of *ycf1* from the total combined analysis yields little support for relationships among the sections of *Dichaea*. Because the partition homogeneity test has been demonstrated to be overly sensitive (Graham et al., 1998; Reeves et al., 2001) and because a total evidence approach yields a highly resolved

and relatively strongly supported topology, all data were combined.

Monophyly of *Dichaea* and its placement within Zygopetalinae are both strongly supported by all analyses (Figs 2 and 3). The monophyly of combined sections *Dichaea* + *Dichaeastrum* is strongly supported. Also, section *Pseudodichaea* is strongly supported in all analyses. However, no individual or combined dataset supports the monophyly of section *Dichaeopsis*.

## DISCUSSION

Although the placement of *Dichaea* within subtribe Zygopetalinae is strongly supported according to molecular data (Whitten et al., 2005), the genus does not share many vegetative or floral features with other members of the subtribe. *Dichaea* species lack the distinctive multi-ridged labellar callus and the short sympodial growth typical of other members of Zygopetalinae. However, *Dichaea* does share a characteristic pollinarium structure of four pollinia attached by four caudicles to a broad stipe terminating in a small, hyaline viscidium (Fig. 1J, K). The monophyly of *Dichaea* is strongly supported by both molecular and morphological data. Synapomorphies of *Dichaea* include elongate, monopodial stems, reduced flower size (relative to most other Zygopetalinae except *Cryptarrhena* R.Br.) and infrastigmatic ligules (Fig. 1I).

Plants of *Dichaea* appear to be monopodial, in contrast to sympodial growth found in rest of Zygopetalinae. In monopodial plants, the axillary shoot has the potential for indefinite apical growth, as in most stems of *Dichaea*, which continue to elongate and root at nodes (Dressler, 1993b). Roots of *Dichaea* are usually small, delicate and sparse. Leaves consist of a sheath and blade, although in many taxa, the abscission layer has been lost. However, no developmental studies of this unusual feature have been made, so another explanation is the loss of the blade and development of a blade-like sheath. Inflorescences of *Dichaea* are single-flowered, a derived condition within Zygopetalinae, but also found in some derived genera of the closely related subtribe Maxillariinae s.l. (Whitten et al., 2007). Flowers have distinctive anchor-shaped labella, which have a largely homogeneous papillose micro-morphology (Davies and Stpiczynska, 2008). Fruits of *Dichaea* are capsules that split along two longitudinal lines of dehiscence (on only one side of the fruit), rather than having three to six lines of dehiscence observed in most orchids (Pupulin, 2007). The surface of the ovary and fruit can be glabrous, setose or spiny. Only sections *Dichaea* and *Pseudodichaea* have ornamentations on the fruit, which can become robust and prickly-like (Fig. 3).

In a recent systematic revision of the *Dichaea* species in Costa Rica, Pupulin (2007) performed parsimony analyses of 62 morphological and anatomical characters. The phylogenetic structure obtained with morphological characters is largely similar to that produced with molecular data. Both morphology and molecular data support the monophyly of section *Pseudodichaea*. Monophyly of sections *Dichaea* and *Dichaeastrum* (combined) is also supported. In some morphological trees, section *Dichaeastrum* is sister to section *Dichaea*, not polyphyletic as indicated by molecular data.

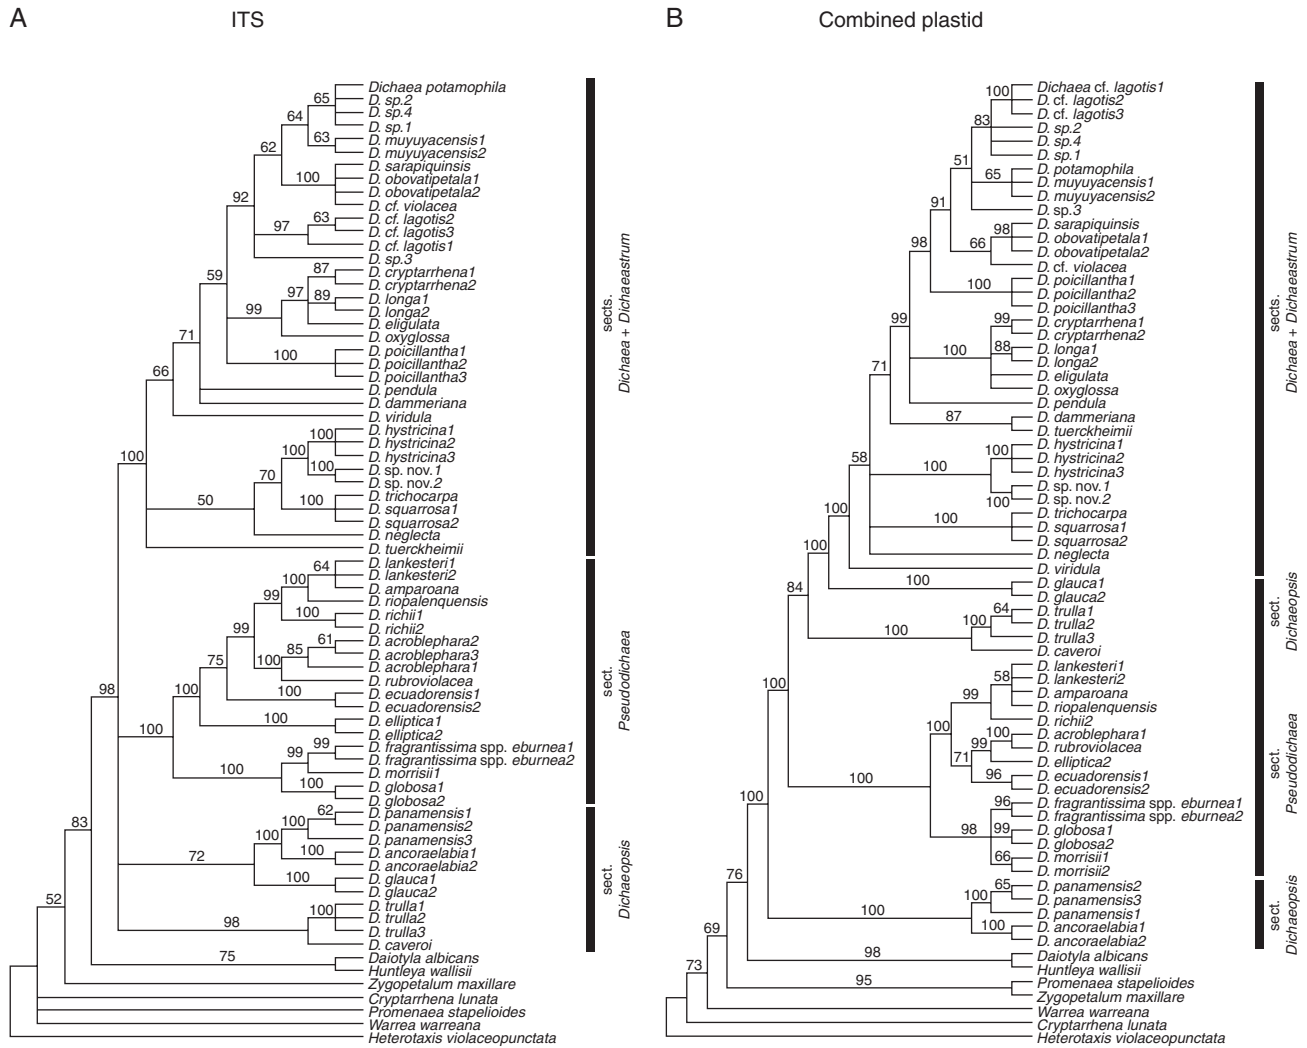

FIG. 2. Comparison of parsimony bootstrap consensus trees for (A) ITS dataset only and (B) plastid combined dataset. Bootstrap percentages are indicated above branches.

Most topological discrepancies between morphological and molecular data sets can be found among species groupings within section *Dichaea*. Morphological data also consistently support the paraphyletic topology of section *Dichaeopsis*, as discussed below.

**Section *Dichaeopsis***

This section, as circumscribed in all classifications proposed to date, is not monophyletic. Cogniaux’s more concise circumscription, including only those taxa with glabrous ovaries and an abscission layer in the leaves, consists of at least three clades that are not each other’s closest relatives.

*Dichaea panamensis* Lindl. and *D. ancoraelabia* C. Schweinf. form a clade (‘Panamensis group’ in Fig. 3) sister to the rest of the genus with strong support. This group of at least eight species has relatively short and narrow leaves (i.e. similar to smaller species of section *Pseudodichaea*; see below), delicate stems, relatively thick roots, dark maroon anther caps, spotted perianth and reduced and bluntly triangular

infrastigmatic ligules (Fig. 1B, F). These characters are shared by most species within this *Dichaeopsis* clade and represent putative synapomorphies. There are, however, many more described species not sampled in this study that are closely related to these two species, based on morphological similarity. These species include *D. campanulata* C.Schweinf., *D. dressleri* Folsom, *D. hutchisonii* D.E.Benn. & Christenson, *D. longipedunculata* D.E.Benn. & Christenson, *D. peruviansis* D.E.Benn. & Christenson and *D. picta* Rchb.f.

Another *Dichaeopsis* clade consists of two species sampled in this study, *D. trulla* Rchb.f. and *D. caveroi* D.E.Benn. & Christenson (‘Trulla group’ in Fig. 3). There is moderate support for this clade sister to the ‘Glaucous group’ + sect. *Dichaea s.l.* This clade of species is well supported and easily diagnosable. The plants typically have erect or semi-erect stems with leaves that are relatively long (up to 10 cm) and narrow (many other species in the genus have leaves that are proportionally broader and 2–4 cm long). Also, the flowers typically have well-developed infrastigmatic ligules (Fig. 1D, E). Other species likely to be included in the ‘Trulla group’



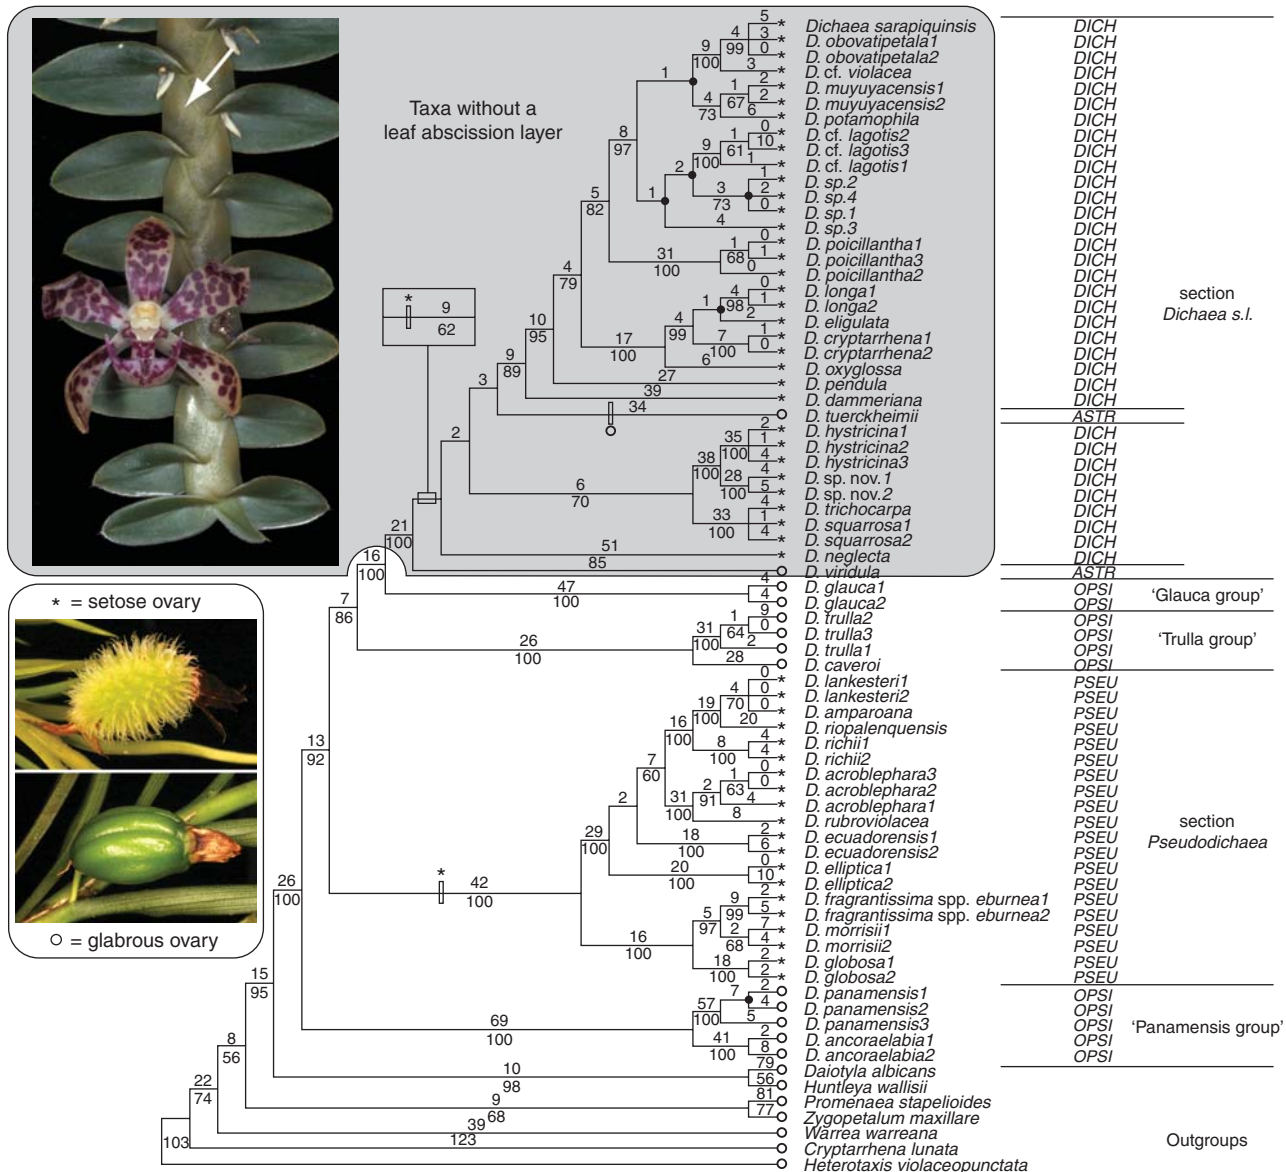

FIG. 3. One of 725 most-parsimonious trees (MPTs) of all molecular data combined (DELTRAN optimization). Branch lengths are above the branches, and bootstrap percentages are below the branches. Branches that collapse in the strict consensus tree are indicated by closed circles. Taxa missing a leaf abscission layer are enclosed within the box. Fruit ornamentation is also shown with character states [glabrous (o) vs. setose (\*)] on branch terminals, and hash-marks in the tree represent apomorphies. Traditional sectional placement for all species is listed by abbreviation (sections *Dichaea*, DICH; *Dichaeastrum*, ASTR; *Dichaeopsis*, OPSI; *Pseudodichaea*, PSEU); present circumscription is listed on the far right.

are *D. calyculata* Poepp. & Endl., *D. powellii* Schltr. (likely a synonym of *D. trulla*) and *D. benzingii* Dodson.

*Dichaea glauca* (Sw.) Lindl. ('Glauca group' in Fig. 3) occurs in Central America and the Caribbean and is the tallest species in the genus. It has glaucous leaves and the thickest roots in the genus. This species also displays multiple inflorescences per stem simultaneously (Fig. 1L), an unusual feature for the genus. The ITS results place this species sister to *D. panamensis* and *D. ancoraelabia*, but with just moderate support. *Dichaea panamensis* also has glaucous leaves, an unusual feature in *Dichaea*. However, plastid results strongly support placement of *D. glauca* sister to sections *Dichaea* and *Dichaeastrum*, even though there is no apparent morphological basis for this relationship.

#### Section *Pseudodichaea*

Two characters define section *Pseudodichaea*: leaves with an abscission layer (plesiomorphic) and setose ovaries (apomorphic). Setose ovaries are also found in section *Dichaea*, making the character homoplasious within the genus (Fig. 3). Although circumscription of section *Pseudodichaea* is based on plesiomorphic and homoplasious characters, it is still monophyletic. Section *Pseudodichaea* is not as closely related to section *Dichaea* as might be supposed based on possession of setose ovaries. These two sections are separated by section *Dichaeastrum* (in part) and a paraphyletic grade of section *Dichaeopsis*.

Molecular results support two main, strongly supported sister groups in section *Pseudodichaea*. One group consists

of at least three species: *D. morrisii* Fawc. & Rendl., *D. fragrantissima* Folsom and *D. globosa* Dressler & Pupulin. These have stout, more or less horizontal stems and relatively large, broad leaves with strongly ancipitous sheaths (Fig. 1P). The other group is much more species rich, with relatively small, narrow leaves (Fig. 1N). The close relationship between *D. amparoana* Schltr. and *D. lankesteri* Ames shown by molecular data was previously suggested based on morphology (Dressler, 1993a; Pupulin, 2007). *Dichaea elliptica* Dressler & Folsom and *D. acroblephara* Schltr. are similar morphologically but not closely related according to these results. Section *Pseudodichaea* is particularly diverse in South America, and many of these species were not sampled in this study (e.g. *D. alcantarae* D.E.Benn. & Christenson, *D. angustisegmenta* Dodson, *D. chasei* Dodson, *D. cleistogama* Dodson, *D. delcastilloi* D.E.Benn. & Christenson, *D. galeata* Dodson, *D. luerorum* Dodson, *D. moronensis* Dodson, *D. sodiroi* Schltr., *D. suarezii* Dodson, *D. tamboensis* Dodson and *D. venezuelensis* Carnevali & I. Ramírez). This section shows high levels of sequence divergence and phylogenetic resolution. Because of the high degree of endemism, biogeographic patterns could probably be determined with increased taxon sampling of this section.

#### Section *Dichaea* sensu lato (including section *Dichaeastrum*)

The most coherent group within *Dichaea* based on morphology consists of sections *Dichaea* and *Dichaeastrum*. This group has leaves lacking an abscission layer, a generally pendulous or creeping habit (Fig. 1M), stems with indeterminate growth and setose (or more rarely, glabrous) ovaries (Fig. 1O). These two sections also form a strongly supported clade with all sampled DNA regions. Pfitzer (1889) and Kuntze (1904) recognized this entire group as section *Dichaea*. Cogniaux (1906) and Schlechter (1914) split the group into sections *Dichaea* and *Dichaeastrum*. This study does not support monophyly of either section *Dichaeastrum* or *Dichaea*. The two species from this study representing section *Dichaeastrum* (*D. tuerckheimii* and *D. viridula* Pupulin) have glabrous ovaries and are relatively diminutive plants. As these two species are not sister groups and are in a poorly supported portion of the tree, section *Dichaeastrum* should be treated as a part of section *Dichaea*. There are more species belonging to this glabrous-ovary group known as section *Dichaeastrum* (e.g. *D. escobariana* Dodson, *D. pumila* Barb.Rodr., *D. retroflexa* Kränzl. and *D. tenuifolia* Schltr.). Species in section *Dichaeastrum* usually have small, thin-textured, non-articulate leaves and glabrous ovaries. Therefore, with greater taxon sampling, a larger monophyletic group of what would be recognized as section *Dichaeastrum* may appear. The type of section *Dichaeastrum* was not sampled; morphological affinity of the type species to either *D. tuerckheimii* or *D. viridula* cannot be assessed at this time.

Section *Dichaea* sensu stricto was monographed by Folsom (1987, 1996), who attempted to diagram the evolutionary patterns within this group, with emphasis on clusters of species complexes. However, his non-cladistic approach to phylogenetic reconstruction leaves much to interpretation as it was based on subjective ideas of relationships among species.

*Dichaea poicillantha* Schltr. is a distinct species on a long branch in all datasets. Folsom placed it near *D. schlechteri* Folsom, *D. cryptarrhena* Rchb.f. ex Kränzl. and *D. muricatoides* Hamar & Garay.

*Dichaea oxyglossa* Schltr., *D. eligulata* Folsom, *D. longa* Schltr. and *D. cryptarrhena* form a strongly supported complex of species in the present analyses. This group does not entirely agree with Folsom's diagram. He placed *D. oxyglossa* and *D. eligulata* near *D. obovatipetala* Folsom, *D. sarapiquinsis* Folsom and *D. retroflexiligula* Folsom. *Dichaea retroflexiligula* was not sampled in this study. *Dichaea obovatipetala* and *D. sarapiquinsis* are not closely related to this group, as postulated by Folsom (1987, 1996).

*Dichaea obovatipetala* and *D. sarapiquinsis* are strongly supported and part of a strongly supported clade of primarily South American taxa (including *D. cf. lagotis* Rchb.f., *D. muyuyacensis* Dodson, *D. potamophila* Folsom and *D. cf. violacea* Folsom). Folsom (1987, 1996) suspected that *D. obovatipetala* and *D. sarapiquinsis*, species endemic to Central America, were closely related to South American taxa based on morphology. *Dichaea obovatipetala* and *D. sarapiquinsis* lack clear cross-venation. Although some accessions sampled from this clade are unidentified, they do represent the South American group, most of which have clear cross-venation.

Folsom (1987, 1996) ignored some taxa that should properly be placed within section *Dichaea*. He referred to one such group as the '*Dichaea hystricina* complex,' including *D. hystricina* Rchb.f., *D. ciliolata* Rolfe and other unspecified species. This complex is monophyletic and distinguished by ciliate leaf margins. The exclusion of this complex from section *Dichaea* would make the latter paraphyletic. Pupulin (2005) studied the *D. hystricina* complex and showed that variation in vegetative morphology in Costa Rican specimens corresponded to a single species. The type of *D. ciliolata* is from Costa Rica, and Pupulin suggested that it is a synonym of *D. hystricina*, which is further corroborated by these data. Molecular and morphological data support the existence in Ecuador of a distinct, undescribed species that is sister to *D. hystricina*. However, more data need to be collected before it should be formally described.

Another distinct clade included *D. trichocarpa* (Sw.) Lindl. and *D. squarrosa* Lindl. *Dichaea intermedia* Ames & Correll is sometimes considered to be a hybrid between *D. trichocarpa* and *D. squarrosa* (Ames and Correll, 1985; Folsom, 1987). Taxon sampling was insufficient to determine the distinctiveness of these three species individually, but they form a clade. Among these taxa in section *Dichaea*, *D. neglecta* Schltr. was poorly supported as sister to the rest of section *Dichaea* with the exclusion of *D. viridula* (Fig. 3). Folsom also cited a few aberrant species that were not closely related to any other species. Species such as *D. pendula* (Aubl.) Cogn. and *D. dammeriana* Kraenzl. were sampled in this study and shown to be part of a paraphyletic grade relative to the core group of section *Dichaea*.

#### Evolution of leaves

According to the present results, the leaf abscission layer was lost once within the genus *Dichaea*. The absence of the

leaf abscission layer is a synapomorphy for section *Dichaea sensu lato*, with no apparent reversions. The lack of an abscission layer has no obvious adaptive value. This condition (marcescent leaves) is uncommon in tropical Orchidaceae, but is found in many Arecaceae and some temperate trees, such as *Fagus* L. Some studies of marcescent leaves in alpine tropical plants have shown that marcescent leaves protect the stem against tissue damage by freezing and desiccation (Smith, 1979). Species of *Dichaea* never occur at such high elevations (Pupulin, 2007), so this feature is unlikely to be an adaptation to freezing. The occurrence of marcescent leaves in sections *Dichaea* and *Dichaeastrum* is associated with a creeping or pendent habit. In these groups, the leaf bases are often twisted 90° so that their adaxial surfaces all face the same direction, making the stem complanate. This condition presumably maximizes the photosynthetic area exposed to light. However, the association among these leaf characters needs further study.

#### Evolution of fruits

Compared with other orchids, *Dichaea* is unusual in having setose or muricate fruits. Some members of the orchid subtribes Pleurothallidinae (e.g. *Pleurothallis* R.Br. subgenera *Kraenzlinella* Kuntze and *Aenigma* Luer; Luer, 1994), *Laeliinae* (e.g. *Pygmaeorchis* Brade; Pridgeon *et al.*, 2005) and *Oncidiinae* (e.g. *Saundersia* Rchb.f.) also have muricate ovaries, although these taxa are not closely related to *Dichaea*. Like almost all other orchid fruits, those of *Dichaea* are dehiscent capsules with wind-dispersed seeds.

It is possible that the spines on the fruits are used in dispersal by adhering to animals. Hooked spines that aid in dispersal are fairly common in many families of flowering plants. However, the setae of *Dichaea* fruits are not strongly uncinat, so it is unlikely that the fruits are exozoochorous. Also, *Dichaea* species have 'dust seeds' that are readily dispersed by wind, so exozoochory of fruits seems superfluous.

Many plants have setose or spiny fruits, which presumably protect seeds against herbivory. Spininess has been shown to inhibit herbivory by small mammals (Cooper and Ginnett, 1998) and by larger animals (Young and Augustine, 2007). However, the fruit setae of many species of sections *Dichaea* and *Pseudodichaea* are soft and could hardly inhibit predation by large or medium-sized herbivores. No assessment of the adaptive value, if any, of these setae has ever been performed. More puzzling than their apparent lack of adaptive value is the polyphyletic nature of their occurrence. Setose fruits appear to have evolved at least twice (Fig. 3), and the groups in *Dichaea* with setose fruits are also the most diverse in terms of species richness.

#### CONCLUSIONS

DNA sequence data were used to investigate the circumscription of sectional classification and species relationships of *Dichaea*. Characters used to separate the sections within the genus have been misleading. Section *Dichaeopsis* was found to be polyphyletic whereas section *Pseudodichaea* is monophyletic. We suggested a broader circumscription of section *Dichaea*, including section *Dichaeastrum*, because

*Dichaeastrum* is polyphyletic and *Dichaea* and *Dichaeastrum* are similar vegetatively and together are easily distinguished from other sections. The marcescent leaves of section *Dichaea sensu lato* have been attained only once, whereas setae on fruits have been attained at least twice within the genus. However, there is no obvious adaptive value to the plants of these unique morphological features. Further investigation into the anatomical structure of the leaves in section *Dichaea* could address the developmental and evolutionary significance of the lack of an abscission layer between sheath and blade. Careful *in situ* observations of orchid taxa with fruit setae may yield more meaningful phylogenetic interpretations of this character. The question of how such a wide range of morphological diversity was shaped and the ecological role behind these features requires further probing in this group of plants.

#### ACKNOWLEDGEMENTS

We thank Jardín Botánico Lankester (Universidad de Costa Rica) for contributing vouchered specimens and tissue. We are grateful to the Portillas of Ecuagenera Ltd in Ecuador for generous access to their collections. Walter Judd gave much taxonomic advice. Bruce Holst facilitated sampling of herbarium specimens for DNA at Marie Selby Botanical Gardens. We thank Mario Blanco, Alec Pridgeon, Mark Chase and one anonymous reviewer for helpful comments on this manuscript. Barbara Sue Carlsward provided technical support. Robert Dressler and Calaway Dodson have helped with identification of specimens. We also thank Michael Moore for his suggestion to use the *ycf1* gene region for phylogenetic analyses, J. Richard Abbott for the use of photographs and Savita Shanker and Patrick Thimote at the Interdisciplinary Center for Biotechnology Research at UF. Portions of this research were funded by the Lewis and Varina Vaughn Fellowship in Orchid Biology and the American Orchid Society's 11th World Orchid Conference Fellowship to K. Neubig, and the US National Science Foundation grant No. DEB-234064 to N. H. Williams and W. M. Whitten.

#### LITERATURE CITED

- Ames O, Correll DS. 1985. *Orchids of Guatemala and Belize*. New York, NY: Dover Publications.
- Cameron KM. 2001. An expanded phylogenetic analysis of Orchidaceae using three plastid genes: *rbcL*, *atpB*, and *psaB*. *American Journal of Botany* 88: 104.
- Cameron KM. 2004. Utility of plastid *psaB* gene sequences for investigating intrafamilial relationships within Orchidaceae. *Molecular Phylogenetics and Evolution* 31: 1157–1180.
- Cameron KM, Chase MW, Whitten WM, *et al.* 1999. A phylogenetic analysis of the Orchidaceae: evidence from *rbcL* nucleotide sequences. *American Journal of Botany* 86: 208–224.
- Chase MW, Hills HG. 1991. Silica gel: an ideal material for field preservation of leaf samples for DNA studies. *Taxon* 40: 215–220.
- Chase MW, Freudenstein JV, Cameron KM, Barrett RL. 2003. DNA data and Orchidaceae systematics: a new phylogenetic classification. In: Dixon KW, Kell SP, Barrett RL, Cribb PJ eds. *Orchid conservation*. Kota Kinabalu: Natural History Publications, 69–89.
- Cogniaux A. 1906. Orchidaceae III. In: de Martius CFP, ed. *Flora Brasiliensis*. Koenigstein: Otto Koeltz Science Publishers, 484–504.



- Cooper SM, Ginnett TF. 1998. Spines protect plants against browsing by small climbing mammals. *Oecologia* **113**: 219–221.
- Davies KL, Stpiczynska M. 2008. Labellar micromorphology of two euglossine-pollinated orchid genera; *Scuticaria* Lindl. and *Dichaea* Lindl. *Annals of Botany* **102**: 805–824.
- Doyle JJ, Doyle JL. 1987. A rapid DNA isolation procedure for small quantities of fresh leaf tissue. *Phytochemical Bulletin, Botanical Society of America* **19**: 11–15.
- Dressler RL. 1993a. *Field guide to the orchids of Costa Rica and Panama*. Ithaca, NY: Comstock Publishing Associates.
- Dressler RL. 1993b. *Phylogeny and classification of the orchid family*. Portland, OR: Dioscorides Press.
- Felsenstein J. 1985. Confidence limits on phylogenies: an approach using the bootstrap. *Evolution* **39**: 783–791.
- Fitch WM. 1971. Toward defining the course of evolution: minimum change for a specific tree topology. *Systematic Zoology* **20**: 406–416.
- Folsom JP. 1987. *A systematic monograph of Dichaea section Dichaea (Orchidaceae)*. PhD Thesis, University of Texas, Austin.
- Folsom JP. 1996. An introduction to the genus *Dichaea* and a synopsis of section *Dichaea*. *Orchid Digest* **60**: 148–155.
- Graham SW, Kohn JR, Morton BR, Eckenwalder JE, Barrett SCH. 1998. Phylogenetic congruence and discordance among one morphological and three molecular data sets from Pontederiaceae. *Systematic Biology* **47**: 545–567.
- Johnson LA, Soltis DE. 1994. *matK* DNA sequences and phylogenetic reconstruction in Saxifragaceae s.s. *Systematic Botany* **19**: 143–156.
- Johnson LA, Soltis DE. 1998. Assessing congruence: empirical examples from molecular data. In: Soltis DE, Soltis PS, Doyle JJ, eds. *Molecular systematics of plants II: DNA sequencing*. Boston, MA: Kluwer Academic Publishers, 297–348.
- Knowles G, Westcott F. 1839. *Dichaea*. *Floral Cabinet* **2**: 167.
- Kränzlin F. 1923. Orchidaceae-Monandreae-Pseudomonopodiales. In: Engler A, ed. *Das Pflanzenreich*. Leipzig: Engelmann, 33–59.
- Kuntze CEO. 1904. Revision of *Dichaea*. In: von Post TE, ed. *Lexicon Generum Phanerogamarum*. Stuttgart: Deutsche Verlags-Anstalt, 171.
- Lindley J. 1833. *The genera and species of orchidaceous plants*. London: Ridgways.
- Luer CA. 1994. Icones pleurothallidarum. XI. Systematics of *Lepanthes* subgenus *Brachycladium*, and *Pleurothallis* subgenus *Aenigma*, subgenus *Elongatia*, and subgenus *Kraenzlinella* (Orchidaceae). *Monographs in Systematic Botany from the Missouri Botanical Garden, St Louis* **52**: 1–50.
- Molvray M, Kores PJ, Chase MW. 2000. Polyphyly of mycoheterotrophic orchids and functional influences of floral and molecular characters. In: Wilson KL, Morrison DA, eds. *Monocots: systematics and evolution*. Collingswood: CSIRO Publishing, 441–448.
- Pfister EH. 1889. Orchidaceae. In: Engler A, Prantl K, eds. *Die Natürlichen Pflanzenfamilien*. 6 edn, 206–207.
- Posada D, Crandall KA. 1998. Modeltest: testing the model of DNA substitution. *Bioinformatics* **14**: 817–818.
- Pridgeon AM, Cribb PJ, Chase MW, Rasmussen FN. 2005. *Genera orchidacearum*. Vol. 4. *Epidendroideae* (part one). Oxford: Oxford University Press.
- Pridgeon AM, Cribb PJ, Chase MW, Rasmussen FN. 2009. *Genera orchidacearum*. Vol. 5. *Epidendroideae* (part two). Oxford: Oxford University Press.
- Pupulin F. 2005. *Dichaea hystricina* and *Dichaea ciliolata*: two species in one and an interesting variation. *Orchids* **74**: 678–683.
- Pupulin F. 2007. Contributions toward a reassessment of Costa Rican Zygopetalinae (Orchidaceae). 3. A systematic revision of *Dichaea* in Costa Rica. *Journal of the Arnold Arboretum* **12**: 15–153.
- Rambaut A. 1996. *Se-Al: Sequence alignment editor, v2.0a11*. University of Oxford, Oxford, UK. Available at website, <http://evolve.zoo.ox.ac.uk/>, last accessed 8 August 2002.
- Reeves G, Chase MW, Goldblatt P, et al. 2001. Molecular systematics of Iridaceae: evidence from four plastid regions. *American Journal of Botany* **88**: 2074–2087.
- Romero G, Carnevali G. 1993. Reappraisal of subtribe Vargasiellinae (Maxillarieae, Orchidaceae). *Novon* **3**: 79–80.
- Schlechter R. 1914. Die Orchideen-Gruppe Dichaeinae Pfitzers. *Orchis* **8**: 1–8.
- Senghas K. 1996. Dichaeinae. In: Schlechter R, ed. *Die Orchideen*. Berlin: Blackwell Wissenschafts-Verlag, 1853–1861.
- Smith AP. 1979. Function of dead leaves in *Espeletia schultzei* (Compositae), an Andean caulescent rosette species. *Biotropica* **11**: 43–47.
- Sun Y, Skinner DZ, Liang GH, Hulbert SH. 1994. Phylogenetic analysis of *Sorghum* and related taxa using internal transcribed spacers of nuclear ribosomal DNA. *Theoretical and Applied Genetics* **89**: 26–32.
- Swofford DL. 1999. *PAUP\*: phylogenetic analysis using parsimony (\*and other methods), version 4.0b10*. Sunderland, MA: Sinauer Associates.
- Szlachetko DL. 1995. Systema orchidaliium. *Fragmenta Floristica et Geobotanica Supplementum* **3**: 1–152.
- Taberlet P, Gielly L, Pautou G, Bouvet J. 1991. Universal primers for amplification of three non-coding regions of chloroplast DNA. *Plant Molecular Biology* **17**: 1105–1109.
- Whitten MW, Williams NH, Chase MW. 2000. Subtribal and generic relationships of Maxillarieae (Orchidaceae) with emphasis on Stanhopeinae: combined molecular evidence. *American Journal of Botany* **87**: 1842–1856.
- Whitten WM, Williams NH, Dressler RL, Gerlach G, Pupulin F. 2005. Generic relationships of Zygopetalinae (Orchidaceae: Cymbidieae): combined molecular evidence. *Lankesteriana* **5**: 87–107.
- Whitten WM, Blanco MA, Williams NH, et al. 2007. Molecular phylogenetics of *Maxillaria* and related genera (Orchidaceae: Cymbidieae) based on combined molecular data sets. *American Journal of Botany* **94**: 1860–1889.
- Williams NH, Chase MW, Fulcher T, Whitten WM. 2001. Molecular systematics of the Oncidiinae based on evidence from four DNA sequence regions: expanded circumscriptions of *Cyrtorchilum*, *Erycina*, *Otoglossum*, and *Trichocentrum* and a new genus (Orchidaceae). *Lindleyana* **16**: 113–139.
- Young TP, Augustine DJ. 2007. Interspecific variation in the reproductive response of *Acacia* species to protection from large mammalian herbivores. *Biotropica* **39**: 559–561.
- Zwickl DJ. 2006. *Genetic algorithm approaches for the phylogenetic analysis of large biological sequence datasets under the maximum likelihood criterion*. PhD Thesis, University of Texas, Austin.

## APPENDIX

## Voucher information and GenBank accession numbers for all taxa used in this study

| Species                                                                  | Country    | Voucher information (herbarium) | ITS      | matK + trnK | trnL-F   | ycf1     |
|--------------------------------------------------------------------------|------------|---------------------------------|----------|-------------|----------|----------|
| <i>Cryptarrhena lunata</i> R. Br.                                        | Costa Rica | Whitten 98000 (FLAS)            | AY870081 | AY869982    | AY869894 | EU123733 |
| <i>Daiotyla albicans</i> (Rolfe) Dressler                                | Panama     | Whitten 1932 (FLAS)             | AY870016 | AY869917    | AY869831 | EU123734 |
| <i>Dichaea acrolephara</i> Schltr. 1                                     | Costa Rica | Pupulin 4795 (USJ-L)            | EU123545 | EU123611    | EU123677 | EU123735 |
| <i>D. acrolephara</i> Schltr. 2                                          | Panama     | Whitten 2669 (FLAS)             | EU123546 | NA          | NA       | NA       |
| <i>D. acrolephara</i> Schltr. 3                                          | Panama     | Blanco 2994 (FLAS)              | EU123547 | NA          | NA       | NA       |
| <i>D. amparoana</i> Schltr.                                              | Costa Rica | Bogarín 679 (USJ-L)             | EU123548 | EU123612    | EU123678 | NA       |
| <i>D. ancoraelabia</i> C.Schweinf. 1                                     | Ecuador    | Neubig 1–2004 (FLAS)            | EU123549 | EU123613    | NA       | EU123736 |
| <i>D. ancoraelabia</i> C.Schweinf. 2                                     | Ecuador    | Whitten 2542 (FLAS)             | EU123550 | EU123614    | EU123679 | EU123737 |
| <i>D. caveroi</i> D.E. Benn. & Christenson                               | Ecuador    | Whitten 2417 (FLAS)             | EU123551 | EU123615    | EU123680 | EU123738 |
| <i>D. cryptarrhena</i> Rchb.f. ex Kraenzl. 1                             | Costa Rica | Pupulin 4436 (USJ-L)            | EU123556 | EU123620    | EU123685 | EU123743 |
| <i>D. cryptarrhena</i> Rchb.f. ex Kraenzl. 2                             | Panama     | Whitten 2610 (FLAS)             | EU123557 | EU123621    | EU123686 | EU123744 |
| <i>D. dammeriana</i> Kraenzl.                                            | Costa Rica | Bogarín & León-Páez 197 (USJ-L) | EU123558 | EU123622    | EU123687 | EU123745 |
| <i>D. ecuadorensis</i> Schltr. 1                                         | Ecuador    | Whitten 1799 (FLAS)             | EU123559 | EU123623    | NA       | EU123746 |
| <i>D. ecuadorensis</i> Schltr. 2                                         | Ecuador    | Whitten 2416 (FLAS)             | EU123560 | EU123624    | EU123688 | NA       |
| <i>D. eligulata</i> Folsom                                               | Costa Rica | Pupulin 1094 (USJ-L)            | EU123561 | EU123625    | EU123689 | EU123747 |
| <i>D. elliptica</i> Dressler & Folsom 1                                  | Costa Rica | Pupulin 5133 (USJ-L)            | EU123562 | NA          | NA       | NA       |
| <i>D. elliptica</i> Dressler & Folsom 2                                  | Costa Rica | Pupulin 4945 (USJ-L)            | EU123563 | EU123626    | EU123690 | EU123748 |
| <i>D. fragrantissima</i> Folsom ssp. <i>eburnea</i> Dressler & Pupulin 1 | Costa Rica | Blanco 513 (USJ-L)              | EU123564 | EU123627    | NA       | EU123749 |
| <i>D. fragrantissima</i> Folsom ssp. <i>eburnea</i> Dressler & Pupulin 2 | Costa Rica | Pupulin 4601 (USJ-L)            | EU123565 | EU123628    | EU123691 | EU123750 |
| <i>D. glauca</i> (Sw.) Lindl. 1                                          | Costa Rica | Pupulin 4734 (USJ-L)            | EU123566 | EU123629    | EU123692 | EU123751 |
| <i>D. glauca</i> (Sw.) Lindl. 2                                          | Mexico     | Neubig 9–2006 (FLAS)            | EU123567 | EU123630    | EU123693 | EU123752 |
| <i>D. globosa</i> Dressler & Pupulin 1                                   | Costa Rica | Pupulin 4517 (USJ-L)            | EU123568 | EU123631    | EU123694 | EU123753 |
| <i>D. globosa</i> Dressler & Pupulin 2                                   | Panama     | Neubig 2–2005 (FLAS)            | EU123569 | EU123632    | EU123695 | EU123754 |
| <i>D. hystricina</i> Rchb.f. 1                                           | Costa Rica | Pupulin 3925 (USJ-L)            | EU123570 | EU123633    | EU123696 | EU123755 |
| <i>D. hystricina</i> Rchb.f. 2                                           | Costa Rica | Pupulin 2925 (USJ-L)            | EU123571 | EU123634    | EU123697 | EU123756 |
| <i>D. hystricina</i> Rchb.f. 3                                           | Costa Rica | Pupulin 4320 (USJ-L)            | EU123572 | EU123635    | EU123698 | EU123757 |
| <i>D. cf. lagotis</i> Rchb.f. 1                                          | Ecuador    | Whitten 1801 (FLAS)             | EU123573 | EU123636    | EU123699 | EU123758 |
| <i>D. cf. lagotis</i> Rchb.f. 2                                          | Ecuador    | Whitten 2477 (QCA)              | EU123574 | EU123637    | EU123700 | EU123759 |
| <i>D. cf. lagotis</i> Rchb.f. 3                                          | Ecuador    | Whitten 2523 (QCA)              | EU123575 | EU123638    | EU123701 | EU123760 |
| <i>D. lankesteri</i> Ames 1                                              | Panama     | Blanco 2993 (FLAS)              | EU123576 | EU123639    | NA       | EU123761 |
| <i>D. lankesteri</i> Ames 2                                              | Costa Rica | Pupulin 3030 (USJ-L)            | EU123577 | EU123640    | EU123702 | EU123762 |
| <i>D. longa</i> Schltr. 1                                                | Ecuador    | Whitten 2684 (FLAS)             | EU123578 | EU123641    | EU123703 | EU123763 |
| <i>D. longa</i> Schltr. 2                                                | Ecuador    | Whitten 2685 (FLAS)             | EU123579 | EU123642    | EU123704 | EU123764 |
| <i>D. morrisii</i> Fawc. & Rendl. 1                                      | Panama     | Neubig 3–2004 (FLAS)            | EU123580 | EU123643    | NA       | EU123765 |
| <i>D. morrisii</i> Fawc. & Rendl. 2                                      | Ecuador    | Neubig 8–2006 (FLAS)            | EU123581 | EU123644    | EU123705 | EU123766 |
| <i>D. muyuyacensis</i> Dodson 1                                          | Panama     | Neubig 5–2004 (FLAS)            | EU123582 | EU123645    | EU123706 | EU123767 |
| <i>D. muyuyacensis</i> Dodson 2                                          | Ecuador    | Whitten 1512 (FLAS)             | EU123583 | EU123646    | EU123707 | EU123768 |
| <i>D. neglecta</i> Schltr.                                               | Mexico     | Higgins 1005 (FLAS)             | EU123584 | EU123647    | EU123708 | EU123769 |
| <i>D. obovatipetala</i> Folsom 1                                         | Costa Rica | Pupulin 5023 (USJ-L)            | EU123585 | EU123648    | EU123709 | EU123770 |
| <i>D. obovatipetala</i> Folsom 2                                         | Costa Rica | Pupulin 4202 (USJ-L)            | EU123586 | EU123649    | NA       | EU123771 |
| <i>D. oxyglossa</i> Schltr.                                              | Costa Rica | Bogarín & León-Páez 186 (USJ-L) | EU123587 | EU123650    | EU123710 | EU123772 |
| <i>D. panamensis</i> Lindl. 1                                            | Costa Rica | Pupulin 3667 (USJ-L)            | EU123588 | EU123651    | EU123711 | EU123773 |
| <i>D. panamensis</i> Lindl. 2                                            | Ecuador    | Whitten 2348 (FLAS)             | EU123589 | EU123652    | EU123712 | EU123774 |
| <i>D. panamensis</i> Lindl. 3                                            | Panama     | Whitten 2556 (FLAS)             | EU123590 | EU123653    | EU123713 | EU123775 |
| <i>D. pendula</i> (Aubl.) Cogn.                                          | Costa Rica | Pupulin 3024 (USJ-L)            | EU123591 | EU123654    | EU123714 | EU123776 |
| <i>D. poicillantha</i> Schltr. 1                                         | Panama     | Blanco 2981 (FLAS)              | EU123592 | EU123655    | EU123715 | EU123777 |
| <i>D. poicillantha</i> Schltr. 2                                         | Costa Rica | Pupulin 4662 (USJ-L)            | EU123593 | EU123656    | EU123716 | EU123778 |
| <i>D. poicillantha</i> Schltr. 3                                         | Panama     | Whitten 2557 (FLAS)             | EU123594 | EU123657    | EU123717 | EU123779 |
| <i>D. potamophila</i> Folsom                                             | Peru       | Neubig 4–2004 (FLAS)            | EU123595 | EU123658    | EU123718 | EU123780 |

|                                                         |            |                      |          |          |          |          |
|---------------------------------------------------------|------------|----------------------|----------|----------|----------|----------|
| <i>D. richii</i> Dodson 1                               | Ecuador    | Whitten 1526 (FLAS)  | EU123592 | NA       | NA       | NA       |
| <i>D. richii</i> Dodson 2                               | Ecuador    | Whitten 2429 (QCA)   | EU123593 | EU123656 | EU123715 | NA       |
| <i>D. riopalenquensis</i> Dodson                        | Ecuador    | Whitten 2731 (FLAS)  | EU123594 | EU123657 | EU123716 | EU123778 |
| <i>D. rubroviolacea</i> Dodson                          | Ecuador    | Whitten 2945 (FLAS)  | EU123595 | EU123658 | EU123717 | EU123779 |
| <i>D. sarapiquinsis</i> Folsom                          | Costa Rica | Pupulin 4856 (USJ-L) | EU123596 | EU123659 | EU123718 | EU123780 |
| <i>D. squarrosa</i> Lindl. 1                            | Costa Rica | Pupulin 5127 (USJ-L) | EU123604 | EU123667 | EU123726 | EU123788 |
| <i>D. squarrosa</i> Lindl. 2                            | Mexico     | Neubig 4–2006 (FLAS) | EU123603 | EU123666 | EU123725 | EU123787 |
| <i>D. trichocarpa</i> (Sw.) Lindl.                      | Costa Rica | Bogarín 173 (USJ-L)  | EU123605 | EU123668 | EU123727 | EU123789 |
| <i>D. trulla</i> Rchb.f. 1                              | Costa Rica | Whitten 2096 (USJ-L) | EU123607 | EU123670 | EU123729 | EU123791 |
| <i>D. trulla</i> Rchb.f. 2                              | Ecuador    | Whitten 2474 (QCA)   | EU123608 | EU123671 | EU123730 | EU123792 |
| <i>D. trulla</i> Rchb.f. 3                              | Ecuador    | Whitten 2475 (FLAS)  | EU123606 | EU123669 | EU123728 | EU123790 |
| <i>D. tuerckheimii</i> Schltr.                          | Costa Rica | Whitten 2097 (USJ-L) | EU123609 | EU123672 | EU123731 | EU123793 |
| <i>D. cf. violacea</i> Folsom                           | Panama     | Neubig 6–2004 (FLAS) | EU123555 | EU123619 | EU123684 | EU123742 |
| <i>D. viridula</i> Pupulin                              | Costa Rica | Pupulin 4752 (USJ-L) | EU123610 | EU123673 | EU123732 | EU123794 |
| <i>D. sp. 1</i>                                         | Ecuador    | Whitten 2709 (FLAS)  | EU123597 | EU123660 | EU123719 | EU123781 |
| <i>D. sp. 2</i>                                         | Ecuador    | Whitten 2434 (QCA)   | EU123598 | EU123661 | EU123720 | EU123782 |
| <i>D. sp. 3</i>                                         | Ecuador    | Whitten 2435 (QCA)   | EU123599 | EU123662 | EU123721 | EU123783 |
| <i>D. sp. 4</i>                                         | Ecuador    | Whitten 2476 (QCA)   | EU123600 | EU123663 | EU123722 | EU123784 |
| <i>D. sp. nov. 1</i>                                    | Ecuador    | Neubig 6–2006 (FLAS) | EU123601 | EU123664 | EU123723 | EU123785 |
| <i>D. sp. nov. 2</i>                                    | Ecuador    | Whitten 2329 (FLAS)  | EU123602 | EU123665 | EU123724 | EU123786 |
| <i>Heterotaxis violaceopunctata</i> (Rchb.f.) F. Barros | Brazil     | Whitten 2294 (FLAS)  | DQ210308 | DQ210807 | NA       | EU123795 |
| <i>H. violaceopunctata</i> (Rchb.f.) F. Barros          | Suriname   | Whitten 1980 (FLAS)  | NA       | NA       | AY869911 | NA       |
| <i>Huntleya wallisii</i> (Rchb.f.) Rolfe                | Ecuador    | Whitten 88026 (FLAS) | AY870074 | EU123674 | AY869887 | EU123796 |
| <i>Promenaea stapelioides</i> (Link & Otto) Lindl.      | Brazil     | Whitten 94102 (FLAS) | AY870101 | AY870002 | AY869905 | EU123797 |
| <i>Warrea warreana</i> (Lodd. ex Lindl.) C. Schweinf.   | Costa Rica | Whitten 1752 (FLAS)  | AF239321 | EU123675 | AF239513 | EU123798 |
| <i>Zygopetalum maxillare</i> Lodd.                      | Brazil     | Whitten 94103 (FLAS) | AY870095 | EU123676 | AY869899 | EU123799 |

Vouchers are deposited at FLAS (Florida Museum of Natural History Herbarium), USJ-L (University of Costa Rica, San José, Lankester Botanical Garden) and QCA (Pontificia Universidad Católica del Ecuador, Quito).
